# Supplementary material for: Monocyte-derived transcriptome signature indicates antibody-dependent cellular phagocytosis as a potential mechanism of vaccine-induced protection against HIV-1
Source: eLife. 2021 Sep 17;10:e69577. doi: 10.7554/eLife.69577 (PMC8514236; doi:10.7554/eLife.69577)
Supplement: Supplementary file 1. — (a) Number of enriched genes from the geneset in different comparisons from multiple studies. (b) Number of enriched genes from the geneset in different comparisons from multiple studies. (c) Relationship between genes associating with ADCP in this study and previously identified pathways. (d) Enriched ADCP genes that belong to the gene ontology phagocytosis pathway. [file elife-69577-supp1.xlsx]

## Sheet: Sheet 1
Supplementary File 1a. Description of vaccine studies investigated
Study	Vaccine Regimen	Species	Study	N	Source	Method	Data generated
09-11	Ad26/gp140	NHP	Preclinical/protection	10	PBMC	RNA-seq	Ehrenberg et al. 2019
13-19	Ad26/gp140	NHP	Preclinical/protection	11	PBMC	RNA-seq	Ehrenberg et al. 2019
13-19	A26/Ad26 +gp140	NHP	Preclinical/protection	12	PBMC	RNA-seq	Ehrenberg et al. 2019
13-19	Ad26/MVA+gp140	NHP	Preclinical/protection	9	PBMC	RNA-seq	Ehrenberg et al. 2019
RV144	ALVAC/gp120	Human	Efficacy	170	Stimulated PBMC	Microarray	Fourati et al. 2019
HVTN 505	DNA/rAd5	Human	Efficacy	47	Sorted B cells and monocytes	RNA-seq	Current study
RV306	ALVAC/gp120	Human	Immunogenicity	24	Whole blood	RNA-seq	Current study
RV306	ALVAC/gp120	Human	Immunogenicity	12	PBMC	scRNA-seq	Current study

## Sheet: Sheet 2
Supplementary File 1b. Number of enriched genes from the geneset in different comparisons from multiple studies
Gene	RV144 infection	09-11 infection	13-19a infection	13-19b infection	RV306 ADCP day3	RV306 ADCP wk2	09-11 ADCP	13-19a ADCP	13-19b ADCP	# enriched
CREB5	No	Yes	Yes	Yes	Yes	Yes	Yes	Yes	Yes	8
ALDH3B1	Yes	Yes	No	Yes	Yes	Yes	Yes	Yes	No	7
DAPK1	Yes	Yes	No	Yes	Yes	Yes	Yes	Yes	No	7
LMNA	Yes	Yes	No	Yes	Yes	Yes	Yes	Yes	No	7
RBM47	Yes	Yes	No	No	Yes	Yes	Yes	Yes	Yes	7
RNF130	Yes	Yes	Yes	Yes	No	Yes	Yes	Yes	No	7
TKT	Yes	Yes	Yes	No	Yes	Yes	Yes	No	Yes	7
TNFSF13	No	Yes	Yes	Yes	No	Yes	Yes	Yes	Yes	7
CAMKK2	Yes	Yes	No	Yes	Yes	Yes	Yes	No	No	6
DOCK5	No	Yes	Yes	Yes	Yes	No	Yes	Yes	No	6
EFHD2	No	No	Yes	No	Yes	Yes	Yes	Yes	Yes	6
GRN	Yes	No	Yes	No	Yes	Yes	No	Yes	Yes	6
KIAA0513	Yes	No	Yes	Yes	Yes	Yes	No	No	Yes	6
MYO1F	Yes	No	No	Yes	Yes	Yes	Yes	Yes	No	6
NFIL3	No	Yes	No	Yes	Yes	Yes	Yes	No	Yes	6
PSAP	Yes	No	Yes	Yes	No	Yes	No	Yes	Yes	6
SEMA4A	Yes	Yes	No	Yes	Yes	Yes	Yes	No	No	6
SIRPA	Yes	Yes	Yes	No	Yes	Yes	Yes	No	No	6
SLC36A1	Yes	Yes	No	Yes	Yes	Yes	Yes	No	No	6
SLCO3A1	Yes	No	Yes	No	Yes	Yes	No	Yes	Yes	6
TBC1D8	Yes	No	Yes	Yes	No	Yes	No	Yes	Yes	6
VIM	No	Yes	Yes	No	Yes	Yes	Yes	Yes	No	6
WDFY3	No	NE	Yes	Yes	Yes	Yes	NE	Yes	Yes	6
ACSL1	No	Yes	No	Yes	Yes	Yes	Yes	No	No	5
ADAM9	Yes	No	No	No	Yes	Yes	No	Yes	Yes	5
ALDOA	No	No	Yes	No	Yes	Yes	No	Yes	Yes	5
AOAH	No	NE	Yes	Yes	No	Yes	NE	Yes	Yes	5
AP2S1	Yes	No	Yes	No	Yes	Yes	No	No	Yes	5
ARRB1	Yes	Yes	No	Yes	No	Yes	Yes	No	No	5
C5AR1	Yes	NE	Yes	Yes	Yes	Yes	NE	No	No	5
CCR1	Yes	NE	Yes	Yes	Yes	No	NE	No	Yes	5
CD63	No	Yes	No	No	Yes	Yes	Yes	Yes	No	5
CSF1R	Yes	No	Yes	No	No	Yes	No	Yes	Yes	5
CSF3R	No	NE	Yes	Yes	Yes	Yes	NE	No	Yes	5
CST3	Yes	No	Yes	Yes	No	No	No	Yes	Yes	5
CTNNA1	No	No	Yes	Yes	Yes	Yes	No	No	Yes	5
FCGRT	Yes	No	Yes	No	Yes	Yes	No	Yes	No	5
GAA	Yes	Yes	Yes	No	No	Yes	No	No	Yes	5
GABARAP	No	Yes	No	No	Yes	Yes	Yes	Yes	No	5
GNAQ	No	No	Yes	No	Yes	Yes	No	Yes	Yes	5
ICAM1	No	No	Yes	No	Yes	Yes	No	Yes	Yes	5
IL17RA	Yes	No	Yes	No	Yes	Yes	No	No	Yes	5
LAMP2	No	Yes	No	Yes	Yes	Yes	Yes	No	No	5
MAFB	Yes	NE	Yes	Yes	No	Yes	NE	Yes	No	5
NAMPT	No	No	Yes	No	Yes	Yes	No	Yes	Yes	5
PGD	Yes	No	No	Yes	Yes	Yes	Yes	No	No	5
RAB32	No	Yes	Yes	No	No	Yes	Yes	No	Yes	5
STX11	No	Yes	No	Yes	Yes	Yes	Yes	No	No	5
TREM1	No	NE	Yes	Yes	Yes	No	NE	Yes	Yes	5
ZYX	No	Yes	No	No	Yes	Yes	Yes	No	Yes	5
AHNAK	No	Yes	No	Yes	No	No	Yes	Yes	No	4
AMPD2	Yes	No	No	No	Yes	No	No	Yes	Yes	4
APOBR	NE	No	Yes	No	No	Yes	No	Yes	Yes	4
ARHGEF10L	No	NE	Yes	Yes	No	No	NE	Yes	Yes	4
ATF3	No	No	Yes	No	Yes	Yes	No	Yes	No	4
BHLHE40	NE	Yes	No	Yes	Yes	No	Yes	No	No	4
BST1	No	Yes	NE	NE	Yes	Yes	Yes	NE	NE	4
CD163	Yes	NE	Yes	Yes	No	No	NE	No	Yes	4
CDC42EP3	No	Yes	No	Yes	No	Yes	Yes	No	No	4
CEBPA	Yes	No	No	Yes	No	Yes	No	No	Yes	4
CEBPD	No	No	Yes	Yes	Yes	Yes	No	No	No	4
CTSD	Yes	No	No	No	Yes	Yes	No	No	Yes	4
DUSP6	Yes	No	Yes	No	No	No	No	Yes	Yes	4
EMILIN2	No	Yes	No	Yes	Yes	Yes	No	No	No	4
ERMAP	No	Yes	Yes	Yes	No	No	Yes	No	No	4
FLVCR2	Yes	NE	Yes	Yes	No	Yes	NE	No	No	4
GLA	No	Yes	No	No	Yes	Yes	Yes	No	No	4
IRAK3	No	Yes	Yes	Yes	No	Yes	No	No	No	4
LEPROT	Yes	Yes	No	No	Yes	Yes	No	No	No	4
LRPAP1	Yes	No	No	No	Yes	Yes	No	Yes	No	4
LST1	No	No	Yes	No	Yes	Yes	No	Yes	No	4
MCL1	No	No	Yes	No	Yes	No	Yes	Yes	No	4
OGFRL1	No	Yes	Yes	Yes	No	No	Yes	No	No	4
PLAUR	No	NE	Yes	No	Yes	Yes	NE	No	Yes	4
RRAGD	No	Yes	No	Yes	Yes	No	Yes	No	No	4
RXRA	No	No	No	Yes	Yes	Yes	Yes	No	No	4
SDCBP	No	Yes	No	Yes	Yes	Yes	No	No	No	4
TALDO1	No	Yes	No	No	Yes	Yes	Yes	No	No	4
TRIB1	No	No	Yes	No	Yes	Yes	No	No	Yes	4
TYROBP	Yes	No	Yes	No	Yes	Yes	No	No	No	4
VEGFA	No	No	No	Yes	No	No	Yes	Yes	Yes	4
ARHGEF40	NE	Yes	No	No	No	Yes	Yes	No	No	3
ATP6AP1	No	Yes	No	No	Yes	Yes	No	No	No	3
CD68	Yes	No	No	No	NE	NE	Yes	Yes	No	3
CD86	No	No	No	Yes	No	No	Yes	Yes	No	3
CDC42EP4	No	Yes	No	No	No	Yes	No	No	Yes	3
CPD	No	No	No	Yes	Yes	No	No	Yes	No	3
CPPED1	No	No	No	Yes	No	Yes	Yes	No	No	3
ENO1	No	No	No	Yes	No	Yes	Yes	No	No	3
FBXL5	No	Yes	No	Yes	No	Yes	No	No	No	3
GAS7	Yes	Yes	No	No	NE	NE	Yes	No	No	3
GNA15	No	No	No	No	No	Yes	No	Yes	Yes	3
HBEGF	No	No	Yes	Yes	No	NE	No	Yes	No	3
HDGF	No	No	No	No	Yes	Yes	Yes	No	No	3
HPSE	No	No	No	Yes	No	Yes	No	Yes	No	3
HSBP1	No	Yes	Yes	Yes	No	No	No	No	No	3
IMPA2	Yes	NE	NE	NE	Yes	Yes	NE	NE	NE	3
MAPKAPK3	No	Yes	No	Yes	No	No	Yes	No	No	3
NAGA	Yes	No	Yes	No	No	No	No	No	Yes	3
NLRP3	No	No	Yes	No	No	No	No	Yes	Yes	3
NPL	Yes	No	No	Yes	Yes	No	No	No	No	3
PXN	Yes	NE	NE	NE	Yes	Yes	NE	NE	NE	3
PYGL	Yes	NE	NE	NE	Yes	Yes	NE	NE	NE	3
QPCT	Yes	NE	NE	NE	Yes	Yes	NE	NE	NE	3
RAB20	Yes	NE	NE	NE	Yes	Yes	NE	NE	NE	3
RCOR1	No	No	No	No	Yes	Yes	No	No	Yes	3
REEP4	No	Yes	No	No	No	No	Yes	No	Yes	3
RGS10	No	No	Yes	No	Yes	Yes	No	No	No	3
SCARB2	Yes	No	No	Yes	No	Yes	No	No	No	3
SIRPB1	Yes	NE	NE	NE	Yes	Yes	NE	NE	NE	3
SLC27A3	No	Yes	NE	NE	No	Yes	Yes	NE	NE	3
SORT1	Yes	NE	NE	NE	Yes	Yes	NE	NE	NE	3
SULT1A2	Yes	NE	NE	NE	Yes	Yes	NE	NE	NE	3
TBXAS1	Yes	NE	NE	NE	Yes	Yes	NE	NE	NE	3
TIMP2	Yes	No	NE	NE	Yes	Yes	No	NE	NE	3
TNFRSF1B	No	No	No	Yes	Yes	Yes	No	No	No	3
UBE2D1	No	Yes	No	No	Yes	Yes	No	No	No	3
VPS37C	No	No	No	Yes	No	Yes	No	No	Yes	3
ZNF467	Yes	NE	NE	NE	Yes	Yes	NE	NE	NE	3
ARAP3	No	NE	NE	NE	Yes	Yes	NE	NE	NE	2
CD14	Yes	NE	NE	NE	Yes	No	NE	NE	NE	2
CD4	No	Yes	No	No	No	No	Yes	No	No	2
CD58	No	Yes	No	No	No	No	Yes	No	No	2
CLEC4A	No	No	Yes	Yes	No	No	No	No	No	2
CREG1	No	Yes	No	Yes	No	No	No	No	No	2
CRISPLD2	No	NE	NE	NE	Yes	Yes	NE	NE	NE	2
CTBP2	Yes	NE	NE	NE	No	Yes	NE	NE	NE	2
CYFIP1	No	No	No	No	No	No	No	Yes	Yes	2
FKBP1A	No	No	No	No	Yes	Yes	No	No	No	2
FPR1	No	NE	NE	NE	Yes	Yes	NE	NE	NE	2
GABARAPL1	No	No	Yes	No	No	No	No	No	Yes	2
GNS	No	No	No	Yes	No	Yes	No	No	No	2
GPX1	No	No	Yes	Yes	NE	NE	No	No	No	2
GSTP1	No	No	No	No	No	Yes	No	Yes	No	2
HCAR3	NE	NE	NE	NE	Yes	Yes	NE	NE	NE	2
HDAC4	No	NE	NE	NE	Yes	Yes	NE	NE	NE	2
HMOX1	Yes	No	No	No	No	No	Yes	No	No	2
ID2	No	No	No	Yes	No	Yes	No	No	No	2
IL1RN	No	NE	NE	NE	Yes	Yes	NE	NE	NE	2
ITM2B	No	No	No	No	Yes	Yes	No	No	No	2
LILRB3	No	NE	NE	NE	Yes	Yes	NE	NE	NE	2
LIN7A	No	NE	NE	NE	Yes	Yes	NE	NE	NE	2
MGST2	No	Yes	No	No	No	No	Yes	No	No	2
MICAL2	No	No	No	Yes	No	No	Yes	No	No	2
NACC2	No	NE	NE	NE	Yes	Yes	NE	NE	NE	2
PHACTR2	No	Yes	No	No	No	No	Yes	No	No	2
PILRA	No	NE	NE	NE	Yes	Yes	NE	NE	NE	2
PLXND1	No	No	No	No	No	No	No	Yes	Yes	2
RAB27A	No	No	No	Yes	No	No	Yes	No	No	2
RTN1	No	Yes	NE	NE	No	No	Yes	NE	NE	2
SERINC5	Yes	No	No	No	No	No	No	No	Yes	2
SIGLEC9	No	NE	NE	NE	Yes	Yes	NE	NE	NE	2
SLC31A2	No	No	No	Yes	No	Yes	No	No	No	2
ST3GAL6	No	Yes	No	No	No	No	Yes	No	No	2
SULT1A1	No	NE	NE	NE	Yes	Yes	NE	NE	NE	2
TNFSF12	No	Yes	No	No	No	No	Yes	No	No	2
ZDHHC7	Yes	Yes	No	No	No	No	No	No	No	2
CD302	No	Yes	NE	NE	No	No	No	NE	NE	1
CSF2RA	No	NE	NE	NE	No	Yes	NE	NE	NE	1
EXT1	No	Yes	No	No	No	No	No	No	No	1
FAM105A	No	No	No	Yes	NE	NE	No	No	No	1
FZD1	Yes	NE	NE	NE	No	No	NE	NE	NE	1
H2AFY	No	No	Yes	No	No	No	No	No	No	1
HEXB	No	No	No	Yes	No	No	No	No	No	1
KLF10	No	No	Yes	No	No	No	No	No	No	1
LGALS2	Yes	NE	NE	NE	No	No	NE	NE	NE	1
LILRA2	No	No	No	No	No	Yes	No	No	No	1
MCTP1	No	NE	NE	NE	No	Yes	NE	NE	NE	1
MPP1	Yes	No	No	No	No	No	No	No	No	1
PCSK5	No	NE	NE	NE	No	Yes	NE	NE	NE	1
PKM2	Yes	NE	NE	NE	NE	NE	NE	NE	NE	1
PSTPIP1	No	No	Yes	No	No	No	No	No	No	1
PTGER2	Yes	NE	NE	NE	No	No	NE	NE	NE	1
S100A12	No	NE	NE	NE	Yes	No	NE	NE	NE	1
SLC30A1	No	No	No	No	No	No	Yes	No	No	1
SMARCD3	No	NE	NE	NE	No	Yes	NE	NE	NE	1
ULK2	No	No	No	No	No	No	No	Yes	No	1
UPP1	No	NE	NE	NE	No	Yes	NE	NE	NE	1
ALDH2	No	No	No	No	No	No	No	No	No	0
C13orf15	NE	NE	NE	NE	NE	NE	NE	NE	NE	0
C1orf54	NE	NE	NE	NE	No	No	NE	NE	NE	0
CALML4	No	NE	NE	NE	No	No	NE	NE	NE	0
EIF4A1	No	No	No	No	No	No	No	No	No	0
EMR2	No	NE	NE	NE	NE	NE	NE	NE	NE	0
EVI2A	No	No	No	No	No	No	No	No	No	0
FAM198B	NE	NE	NE	NE	NE	NE	NE	NE	NE	0
FBN2	No	NE	NE	NE	No	No	NE	NE	NE	0
FTL	No	No	No	No	No	No	No	No	No	0
FUT4	No	NE	NE	NE	No	No	NE	NE	NE	0
IGFBP7	No	NE	NE	NE	No	No	NE	NE	NE	0
LAPTM4A	No	No	No	No	No	No	No	No	No	0
MID1IP1	No	No	No	No	No	No	No	No	No	0
MIR22HG	NE	NE	NE	NE	NE	NE	NE	NE	NE	0
NDFIP1	No	No	No	No	No	No	No	No	No	0
PGCP	No	NE	NE	NE	NE	NE	NE	NE	NE	0
PID1	No	NE	NE	NE	No	No	NE	NE	NE	0
RNASE2	No	NE	NE	NE	No	No	NE	NE	NE	0
SEPX1	No	NE	NE	NE	NE	NE	NE	NE	NE	0
SGK1	No	NE	NE	NE	No	No	NE	NE	NE	0
TIAM1	No	NE	NE	NE	No	No	NE	NE	NE	0
Enriched genes	63	58	58	68	93	118	59	50	50
NE: Not expressed

## Sheet: Sheet 3
Supplementary File 1c. Relationship between genes associating with ADCP in this study and previously identified pathways
Pathway	Gene
Immune System	C5AR1, SDCBP, SIRPA, TYROBP, IL17RA, PLAUR, TALDO1, VIM, CEBPD, CSF3R, IL1RN, ICAM1, FPR1, TNFRSF1B, PILRA, FKBP1A, AP2S1, SIGLEC9, CRISPLD2, QPCT, ALDH3B1, LAMP2, LILRB3, BST1, GLA, UBE2D1, TIMP2, CD63, GRN, SIRPB1, PYGL, ALDOA, CTSD
Innate Immune System	C5AR1, SDCBP, SIRPA, TYROBP, PLAUR, FPR1, TNFRSF1B, SIGLEC9, CRISPLD2, QPCT, ALDH3B1, LAMP2, LILRB3, BST1, GLA, UBE2D1, TIMP2, CD63, GRN, SIRPB1, PYGL, ALDOA, CTSD
Signaling by Interleukins	IL17RA, TALDO1, VIM, CEBPD, CSF3R, IL1RN, ICAM1, FPR1, TNFRSF1B
Hallmark Inflammatory Response	PLAUR, CSF3R, ICAM1, FPR1, TNFRSF1B, NAMPT, C5AR1
Hallmark TNFA Signaling via NFKB	PLAUR, CEBPD, ICAM1, TRIB1, NFIL3, ATF3, NAMPT
Cell-Cell Communication	SIRPA, TYROBP, PXN, CTNNA1, SIRPB1
Interleukin-10 Signaling	IL1RN, ICAM1, FPR1, TNFRSF1B
Signal Regulatory Protein Family Interactions	SIRPA, TYROBP, SIRPB1
Pentose Phosphate Pathway	TALDO1, PGD, TKT

## Sheet: Sheet 4
Supplementary File 1d. Enriched ADCP genes that belong to the gene ontology phagocytosis pathway
Gene	GO class	# of related genes	Additional genes
TYROBP	apoptotic cell clearance	36	MYO1F, FCGRT, CD63, GRN, PYGL, CTSD, SIRPA, STX11, TBXAS1, LST1, TKT, PILRA, C5AR1, EFHD2, EMILIN2, RGS10, SIGLEC9, ALDH3B1, LILRB3, TIMP2, RAB20, ZYX, BST1, SDCBP, SULT1A1, DAPK1, GABARAP, GLA, SIRPB1, CSF3R, FPR1, IL17RA, TNFRSF1B, PLAUR, CEBPD, ICAM1
SIRPA	regulation of phagocytosis	18	MYO1F, LRPAP1, RAB20, TBXAS1, SIRPB1, LST1, GLA, ARAP3, ITM2B, DAPK1, NFIL3, ACSL1, ZYX, SORT1, TYROBP, CEBPD, TNFRSF1B, VIM
SIRPB1	regulation of phagocytosis	14	SEMA4A, LST1, MYO1F, NFIL3, CREB5, ACSL1, SLC36A1, BST1, C5AR1, CSF3R, SDCBP, SIRPA, FPR1, TYROBP
RAB20	phagosome-lysosome fusion	10	CTSD, ICAM1, MYO1F, SULT1A1, FCGRT, SIRPA, TYROBP, TRIB1, LILRB3, IL17RA
